# Supplementary material for: Metformin restores crizotinib sensitivity in crizotinib-resistant human lung cancer cells through inhibition of IGF1-R signaling pathway
Source: PubMed Central journal article supplement (PMC5085167; doi:10.18632/oncotarget.9120), 2016-04-30
Supplement: oncotarget-07-34442-s001.pdf [file oncotarget-07-34442-s001.pdf]

## Metformin restores crizotinib sensitivity in crizotinib-resistant human lung cancer cells through inhibition of IGF1-R signaling pathway

### Supplementary Materials

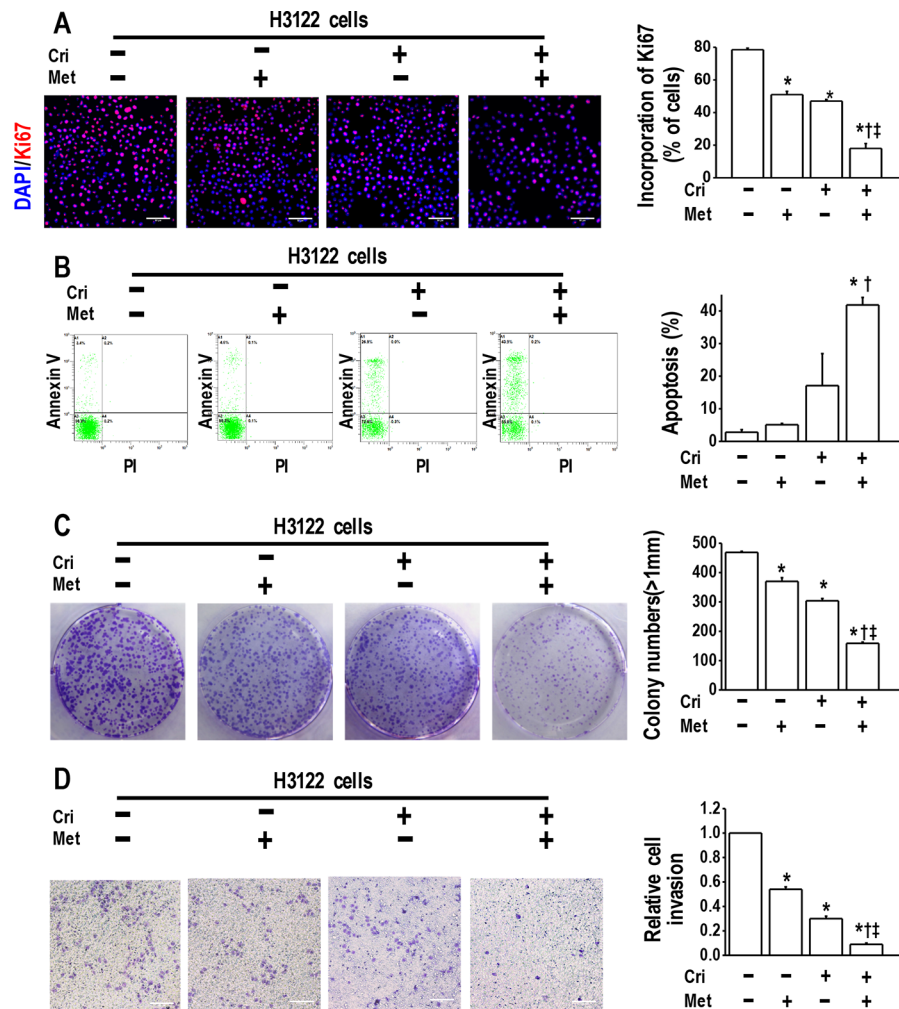

**Supplementary Figure S1: Metformin increased crizotinib sensitivity in crizotinib-sensitive H3122 cells.** (A) Metformin (5 mM) and crizotinib (200 nM) synergistically inhibited the proliferation of H3122 cells, as determined by a Ki67 incorporation assay. \* $p < 0.01$  compared with control; † $p < 0.01$  compared with the crizotinib treatment alone; ‡ $p < 0.01$  compared with that of metformin treatment alone. Scale bars, 50  $\mu\text{m}$ ; (B) Metformin (5 mM) in combination with crizotinib (200 nM) significantly enhanced the apoptosis of H3122 cells. The images are representative of three independent experiments. \* $p < 0.01$  compared with that of control, † $p < 0.01$  compared with metformin treatment; (C) Metformin (5 mM) in combination with crizotinib (200 nM) significantly inhibited colony-forming ability of H3122 cells. Cells were cultured for 14 days and then fixed and stained. Colonies with a diameter greater than 1 mm were counted. \* $p < 0.01$  compared with control; † $p < 0.01$  compared with the crizotinib treatment alone; ‡ $p < 0.05$  compared with that of metformin treatment alone; (D) Metformin (5 mM) and crizotinib (200 nM) synergistically inhibited invasiveness of H3122 cells. Scale bars: 100  $\mu\text{m}$ . \* $p < 0.01$  compared with control; †,  $p < 0.01$  compared with the crizotinib treatment alone; ‡,  $p < 0.05$  compared with that of metformin treatment alone. Met, metformin; Cri, crizotinib.

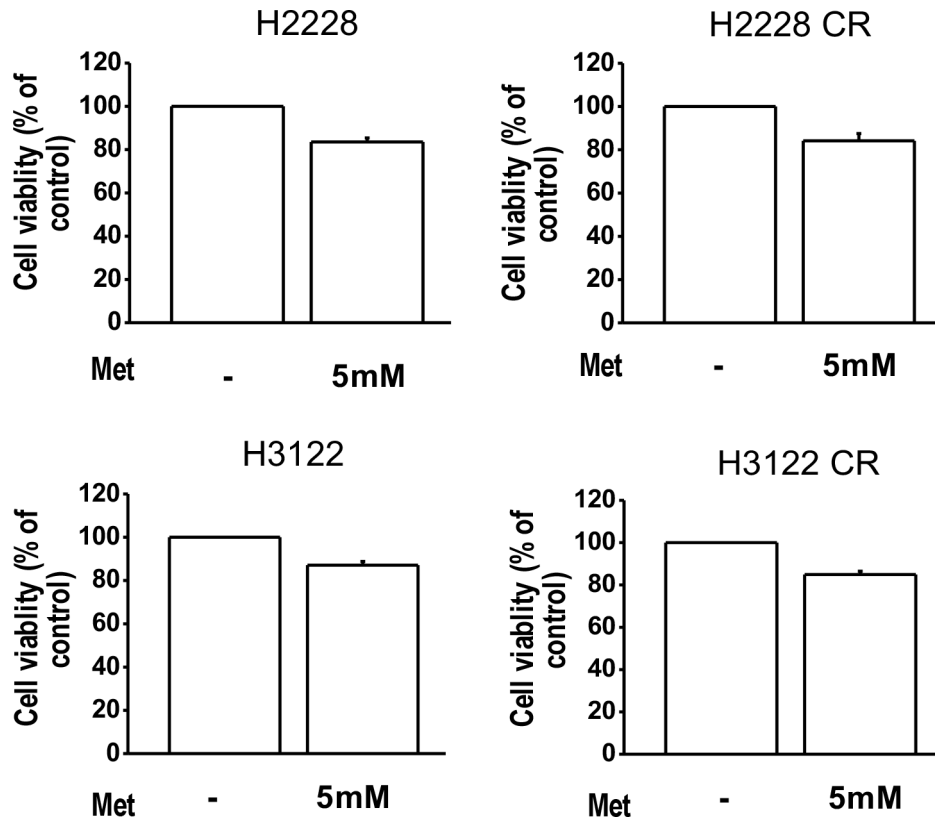

**Supplementary Figure S2: Metformin alone slightly decreased cell viability.** Metformin of 5 mM slightly decreased cell viability in four types of cells used in the current study.

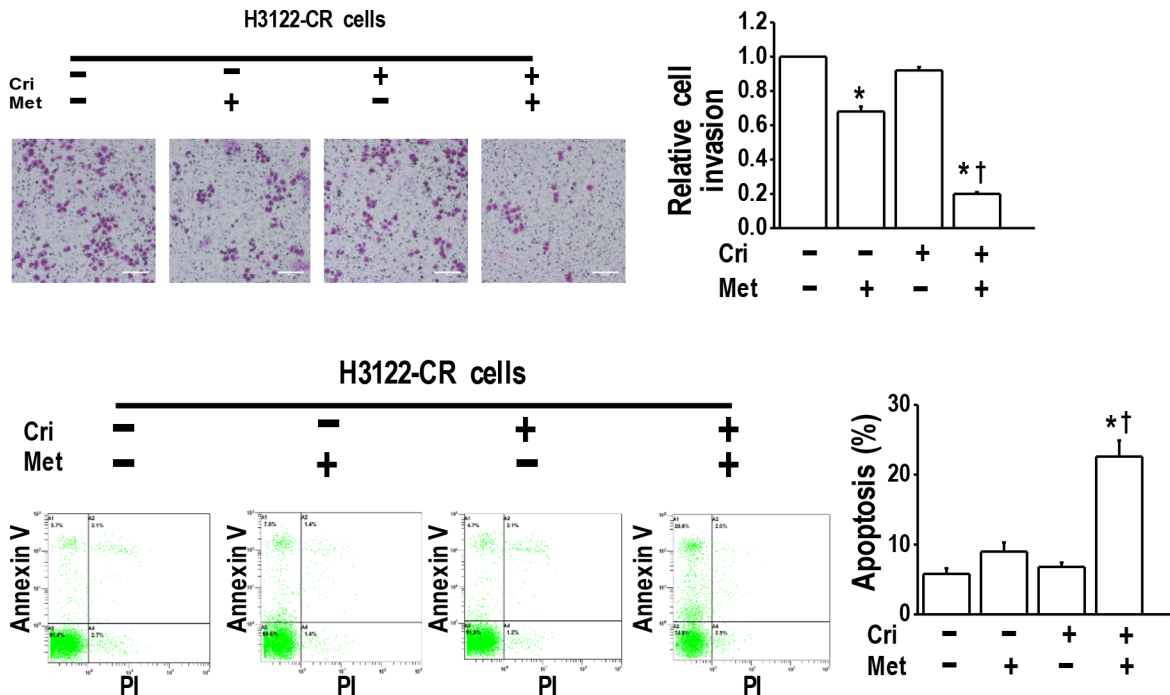

**Supplementary Figure S3: Metformin decreased invasion and enhanced apoptosis in H3122-CR cells.** (A) Metformin (5 mM) and crizotinib (1  $\mu$ M) synergistically inhibited invasiveness of H3122-CR cells. Scale bars: 100  $\mu$ m. \* $p$  < 0.01 compared with control; † $p$  < 0.01 compared with the crizotinib or metformin treatment alone; (B), Metformin (5 mM) in combination with crizotinib (1  $\mu$ M) significantly enhanced the apoptosis of H3122-CR cells. The images are representative of three independent experiments. \* $p$  < 0.01 compared with that of control, † $p$  < 0.01 compared with metformin treatment; Met, metformin; Cri, crizotinib.
